# Supplementary material
Source: ML conference proceedings conference paper supplement (https://openreview.net/forum?id=rwTfoRdQcxW)
Supplement: supplementary_material [file attachment]

# On Coordinate Decoding for Keypoint Estimation Tasks

The purpose of this document is to provide detailed instructions for running the experiments reported in the reproducibility report.

## Training scripts

### Requirements

- Install moai (<https://github.com/ai-in-motion/moai>)
- Download the public dataset.

The required configuration files to reproduce the reported experiments are provided to the readers. The command that starts an experiment is the following.

```
moai train {experiment_config} --config-dir .  
          H4D_train_split={train_data_path}  
          H4D_test_split={test_data_path}  
          H4D_val_split={val_data_path}
```

where `{*_data_path}` is the root path of the HUMAN4D dataset split, and `{experiment_config}` the configuration file for the experiment to be conducted.

## Interactive plots

For several experiments, a tool for easy inspection and filtering across them is necessary. To that end, we provide interactive plots (Figure 1) in html format, by leveraging [HiPlot](#).

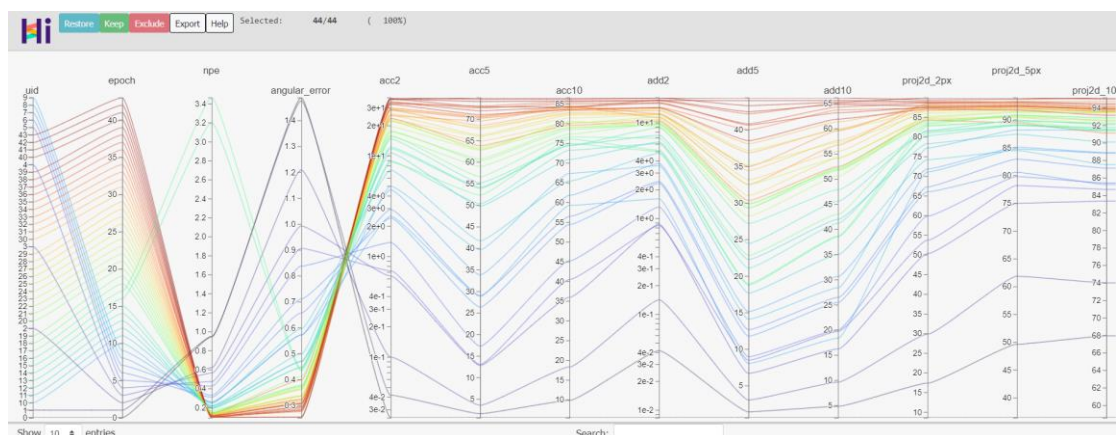

Figure 1: HiPlot screenshot showing the performance of different methods in the validation set

We have generated these plots for all trained models, being available in the following folder `".\actions\plot\2021-01-30"`.

However, we provide the source files used for generating these plots and readers will be able to reproduce them by running the below commands:

```
moai plot "+experiment.name=H4D_pose_regression_hrnet_quant_eval_dark"  
          "root= .\ validation_files "  
          "metrics_options.epoch_value=[0,33]"  
          "monads=false"
```
